# Supplementary material for: Listeria monocytogenes: Investigation of Fitness in Soil Does Not Support the Relevance of Ecotypes
Source: Front Microbiol. 2022 Jun 13;13:917588. doi: 10.3389/fmicb.2022.917588 (PMC9234652; doi:10.3389/fmicb.2022.917588)
Supplement: Supplementary file 3 [file Table_2.XLSX]

## Sheet: whole collection (216 genomes)
Table S2: hits in genes (reference LV-BOV-CP-29) for the whole genomic collection
Locus / gene	hits	maxp	avg_af	avg_maf	avg_beta	annotation	comment	reference	fitness (n k-mer)
HCFLCJGM_00001	2	8.66154	0.0139	0.0139	9.54	whiB transcriptionnal regulator (microbacterium)			high (2)
HCFLCJGM_00555	1	7.5867	0.986	0.014	9.16	hypothetical protein			poor (1)
HCFLCJGM_01067	5	9.48545	0.0185	0.0185	8.414	HTH transcriptionnal regulator (phage related)	phage region		high (1)
HCFLCJGM_01068	4	8.23062	0.01965	0.01965	7.9675	hypothetical protein	phage region		high (1)
HCFLCJGM_01078	3	8.95468	0.0215667	0.0215667	7.92	hypothetical protein	phage region		high (1)
HCFLCJGM_01087	2	7.51999	0.02085	0.02085	7.78	DUF722 domain-containing protein (gp36)	phage region		high (2)
HCFLCJGM_01110	1	7.4828	0.0278	0.0278	6.47	hypothetical protein	phage region		high (1)
HCFLCJGM_01111	2	8.19382	0.03705	0.03705	6.005	GNAT family N-acetyltransferase	phage region		high (2)
HCFLCJGM_01113	2	7.5867	0.0139	0.0139	9.16	transcriptional regulator	phage region		high (1)
rpoC	1	8.23062	0.981	0.019	8.28	DNA-directed RNA polymerase subunit beta'	catalyzes the transcription of DNA into RNA (RNA polymerase beta subunit) mutation linked to resistance to cephalosporin	Braschi et al. (2018)	poor (1)
yqbO	1	11.58	0.0139	0.0139	11.3	phage related protein (tail tape measure - similar to the skin element in Bacillus)	part of the skin element (defective prophage in bacillus subtilis grant protection against phages )	shota et al. (2020)	high (1)

## Sheet: lineage2 (121 genomes)
Table S2: hits in genes (reference LV-BOV-CP-29) for the lineage 2
gene	hits	maxp	avg_af	avg_maf	avg_beta	annotations	comment	reference	fitness (n k-mer))
ackA_2	1	8.54061	0.0172	0.0172	11.1	acetate kinase	activated on glucose excess, regulating Listeria monocytogenes motility and chemotaxis and biofilm formation	Gueriri et al. (2008)	high (1)	2225
clpB	2	9.08566	0.0172	0.0172	11.25	ATP-dependent chaperone ClpB	thermotolerance in listeria - involved in virulence	Chastanet et al. (2004)	high (1); poor (1)
ctsr	238	11.684	0.0619475	0.0619475	12.3681	class three stress gene repressor	after rRNA - inctivation present hypovirulence, reduced flaA expression and reduced stress resistance	Karatzas (2003)	high (228); poor(10)
cwlK	4	12.3536	0.0172	0.0172	11.4	Peptidoglycan L-alanyl-D-glutamate endopeptidase CwlK	phage related - 94% id avec une metallopeptidase M15 (involved in cell wall biosynthesis a metabolism - possible bacteriophage endolysin)	Fukushima et al. (2007)	high (4)
cysK	24	10.0894	0.0172	0.0172	12.6	Cysteine synthase A	is induced after cold and oxidative stresses in B. subtilis	Duché et al. (2002)	high (24)
folP	24	10.0894	0.0172	0.0172	12.6	Dihydropteroate synthase	resistance genes against to sulfonamides	Wang et al. (2019)	high (24)
gdh	1	8.54061	0.0172	0.0172	11.1	NADP-specific glutamate dehydrogenase	Listeria monocytogenes utilizes the glutamate decarboxylase (GAD) system to maintain pH homeostasis within the cell and survive under acidic conditions	Patange et al. (2019)	high (1)
HCFLCJGM_00001	20	11.684	0.01894	0.01894	10.847	whiB transcriptionnal regulator (microbacterium)	regulator		high (20)
HCFLCJGM_00002	5	10.0894	0.0172	0.0172	10.68	IS3 family transposase			high (5)
HCFLCJGM_00003	2	10.5867	0.0172	0.0172	12.4	transposase/integrase			high (2)
HCFLCJGM_00171|HCFLCJGM_00172	21	7.74715	0.0172	0.0172	10.5	DUF3130 domain-containing protein|ribonuclease P	intergenic region		high (21)
HCFLCJGM_00172	78	7.74715	0.0172	0.0172	10.5	ribonuclease P			high (78)
HCFLCJGM_00555	9	10.752	0.661067	0.338933	11.7111	hypothetical protein	hypothetical		poor(9)
HCFLCJGM_00666	2	10.0894	0.0172	0.0172	11.85	Rgg/GadR/MutR family transcriptional regulator	widespread family of proteins among Gram-positive bacteria enabling the cellular equivalent of social networking	Ferdele (2012)	high (2)
HCFLCJGM_00939	1	8.54061	0.0172	0.0172	11.1	hypothetical protein	hypothetical		high (1)
HCFLCJGM_00940	1	8.54061	0.0172	0.0172	11.1	DUF3130 family protein			high (1)
HCFLCJGM_01065	5	7.61979	0.03278	0.03278	7.868	hypothetical protein H2675_gp34	phage related		high (5)
HCFLCJGM_01067	26	10.8996	0.0198731	0.0198731	10.2565	HTH transcriptionnal regulator (phage related)	phage region		high (26)
HCFLCJGM_01068	21	9.08566	0.0192667	0.0192667	10.3076	hypothetical protein	phage region		high (21)
HCFLCJGM_01073	1	8.54061	0.0172	0.0172	11.1	hypothetical protein	phage region		high (1)
HCFLCJGM_01074	9	11.684	0.0172	0.0172	10.3	hypothetical portein	phage region		high (9)
HCFLCJGM_01075	14	7.09637	0.0172	0.0172	10	hypothetical protein	phage region		high (14)
HCFLCJGM_01078	11	10.5867	0.0179909	0.0179909	10.9073	hypothetical protein	phage region		high (11)
HCFLCJGM_01079	1	7.78781	0.0172	0.0172	10.6	siphovirus Gp157 family protein	phage region		high (1)
HCFLCJGM_01083	127	7.75696	0.0259	0.0259	8.4285	DNA primase	phage region		high (127)
HCFLCJGM_01086	30	10.5867	0.0189367	0.0189367	11.122	DUF3310 domain-containing protein	phage region		high (30)
HCFLCJGM_01086|HCFLCJGM_01087	2	8.81816	0.0172	0.0172	11.1	phage proteins	intergenic - phage region		high (2)
HCFLCJGM_01087	122	12.3536	0.0181975	0.0181975	10.8155	DUF722 domain-containing protein (gp36)	phage region		high (122)
HCFLCJGM_01088	22	12.3536	0.0183864	0.0183864	10.7441	hypothetical protein	phage region		high (22)
HCFLCJGM_01091	5	11.684	0.0172	0.0172	11.32	terminase large subunit	phage region		high (5)
HCFLCJGM_01092	102	11.684	0.0172	0.0172	10.3314	phage portal protein	phage region		high (102)
HCFLCJGM_01098	2	8.54061	0.0172	0.0172	10.75	hypothetical protein	phage region		high (2)
HCFLCJGM_01099	1	11.684	0.0172	0.0172	12.7	DUF3168 domain-containing protein	phage region		high (1)
HCFLCJGM_01100	1	7.09637	0.0172	0.0172	10	phage tail protein	phage region		high (1)
HCFLCJGM_01102	2	8.54061	0.0172	0.0172	11.1	hypothetical protein	phage region		high (2)
HCFLCJGM_01104|HCFLCJGM_01105	12	7.09637	0.0172	0.0172	10	phage tail protein|putative phage tail protein	intergenic - phage region		high (12)
HCFLCJGM_01105	599	8.54061	0.017229	0.017229	9.9999	putative phage tail protein	phage region		high (599)
HCFLCJGM_01111	4	8.81816	0.02585	0.02585	9.18	GNAT family N-acetyltransferase	phage region		high (4)
HCFLCJGM_01112	4	8.81816	0.0172	0.0172	11.1	AP2 domain-containing protein	phage region		high (4)
HCFLCJGM_01113	1	8.54061	0.0172	0.0172	11.1	transcriptional regulator	phage region		high (1)
HCFLCJGM_01114	7	8.54061	0.0172	0.0172	10.9286	hypothetical protein	phage region		high (7)
HCFLCJGM_01115	30	8.54061	0.0172	0.0172	10.4767	hypothetical protein	phage region		high (30)
HCFLCJGM_01537	3	7.70115	0.0172	0.0172	10.6	hypothetical protein	hypothetical		high (3)
HCFLCJGM_01613	1	7.63639	0.0172	0.0172	10.4	class I SAM-dependent methyltransferase			high (1)
HCFLCJGM_01698	1	8.54061	0.0172	0.0172	11.1	peptidoglycan-binding protein			high (1)
HCFLCJGM_02052	98	10.0894	0.0172888	0.0172888	12.5604	transposase, partial			high (98)
HCFLCJGM_02052|yvoA_2	3	10.0894	0.0172	0.0172	12.6	hypothetical protein|HTH-type transcriptional repressor YvoA	intergenic region	Resch et al. (2010)	high (3)
HCFLCJGM_02209	98	9.46092	0.0260755	0.0260755	9.31633	HTH transcriptionnal regulator	regulator		high (98)
iap_2	1	7.48413	0.0172	0.0172	10.4	invasion associated protein p60	invasion of non-professional phagocytic cells by Listeria	Krawczyk-Balska et l. (2005)	high (1)
inlA_5	1	7.42022	0.0172	0.0172	10.4	class 1 internalin InlI	internalin unknown function		high (1)
inlJ_6	2	10.0894	0.0172	0.0172	11.85	MucBP domain-containing protein	membran protein -internalin like	Sabet et al. (2005)	high (2)
lysS	238	11.684	0.0619475	0.0619475	12.3681	Lysine--tRNA ligase	before rRNA		high (228); poor(10)
lytC	1	7.09637	0.0172	0.0172	10	N-acetylmuramoyl-L-alanine amidase LytC	autolysin - implicated in cell separation and lysis	Blackman et al. (1998);	high (1)
msmE	22	8.54061	0.8952	0.1048	10.4636	sugar ABC transporter substrate-binding protein	ABC transporter		high (2); poor (20)
nagA_1	2	8.54061	0.0172	0.0172	10.85	N-acetylglucosamine-6-phosphate deacetylase	essential for both maintaining the shape of the bacterial envelope and for normal cell division	Popowska et al. (2011)	high (2)
nemR	2	10.0894	0.0172	0.0172	11.5	HTH-type transcriptional repressor NemR (ydhM)	regulator of the nemA gene involved in detoxification (methylglyoxal)resistance to oxydative stress	Horinouchi et al. (2017)	high (1); poor (1)
perR	8	8.098	0.620825	0.379175	10.5875	Putative peroxide stress response regulator	deletion/mutation hinder cell growth and increase sensitivity to H2O2 (proche tRNA)	Rea et al. (2005)	high (5); poor (3)
rpoC	3	8.54061	0.336133	0.336133	10.46	DNA-directed RNA polymerase subunit beta'	catalyzes the transcription of DNA into RNA (RNA polymerase beta subunit) mutation linked to resistance to cephalosporin	Braschi et al. (2018)	high (2); poor(1)
rpsB	3	7.70115	0.0172	0.0172	10.6	30S ribosomal protein S2	induced by high hydrostatic pressure	Soni et al. (2011)	high (3)
rutR	1	7.15243	0.0345	0.0345	7.17	HTH-type transcriptional regulator RutR	The RutR regulon was found to include a large number of genes encoding components for not only degradation of pyrimidines but also transport of glutamate, synthesis of glutamine, synthesis of pyrimidine nucleotides and arginine, and degradation of purines.	Shimada et al. (2007)	high (1)
salA	2	10.0894	0.0172	0.0172	11.5	Mrp/NBP35 family ATP-binding protein	transcription regulator - acivate a major exoprotease	Derouiche et al. (2015)	high (1); poor (1)
slt|HCFLCJGM_00555	34	10.752	0.983	0.017	12.2	Soluble lytic murein transglycosylase|hypothetical protein	intergenic - slt is linked to bacterial proliferation and virulence associated (peptidoglycane degradation) (P60-like family)	Keep et al. (2006); Quay et al. (2015)	poor (34)
speG_1	1	7.74715	0.0172	0.0172	10.5	GNAT family N-acetyltransferase	putative spermidine acetyltransferase. Is known to be involved in various roles in bacteria	Tsimbalyuk et al. (2020)	high (1)
srlR_3	98	9.46092	0.0260755	0.0260755	9.31633	Glucitol operon repressor (DeoR/GlpR transcriptional regulator)	regulate numerous genes not yet fully elucidated. involved in desiccation resistance	Palud et al. (2018)	high (98)
uvrC_2	2	8.54061	0.5001	0.4999	10.8	excinuclease ABC subunit UvrC	DNA repair resistance to oxydatif stress	Patange et al. (2019)	high (1); poor (1)
xerD_1	5	12.3536	0.03104	0.03104	8.764	site-specific integrase	phage related		high (5)
yafV_2	1	9.08566	0.0172	0.0172	11.4	Omega-amidase YafV	May function as a metabolite repair enzyme (By similarity)	#N/A	high (1)
ycaD	8	8.098	0.620825	0.379175	10.5875	putative MFS family transporter protein	major facilitator of salt resistance. transport of the glucosylglycerol osmolite.	Duché et al. (2002)	high (5); poor (3)
yqbO	10	8.54061	0.0172	0.0172	10.34	phage related protein (tail tape measure - similar to the skin element in Bacillus)	part of the skin element (defective prophage in bacillus subtilis grant protection against phages )	Shota et al. (2020)	high (10)
	2243
		168

## Sheet: lineage1 (95 genomes)
Table S2: hits in genes (reference DE-RDE-FE-17) for the lineage 1
gene	hits	maxp	avg_af	avg_maf	avg_beta	annotation	comment	reference	fitness (N k-mer)
IEOCHNDG_01235|msrA	32	5.41908	0.928	0.072	5.32	Putative trans-acting regulator | peptide-methionine (S)-S-oxide reductase MsrA			poor (32)
msrA	31	5.41908	0.928	0.072	5.32	peptide-methionine (S)-S-oxide reductase MsrA	Has an important function as a repair enzyme for proteins that have been inactivated by oxidation.	Hain et al. (2012)	poor (31)
gpx1	24	5.16178	0.939067	0.0609333	9.45	Hydroperoxy fatty acid reductase gpx1	protection of membrane integrity Under normal and stress conditions	Gader et al. (2004)	poor (23) high (1)
inlJ_6	16	6.45223	0.0206	0.0206	10.4344	internaline	internalin fragment - close to inlJ_5		high (16)
IEOCHNDG_00732	15	6.45223	0.0206	0.0206	10.5	YuzD family protein (DUF1462 family protein)	Putative disulfide oxidoreductase (unknown function)		high (15)
IEOCHNDG_02012	4	6.45223	0.028325	0.028325	9.075	hypothetical ABC transporter			high (4)
IEOCHNDG_02013	3	6.45223	0.0274667	0.0274667	9.23333	hypothetical regulator protein			high (3)
IEOCHNDG_02715	3	5.46092	0.0412	0.0412	6.95	hypothetical protein			high (3)
IEOCHNDG_02782	3	5.54061	0.0240333	0.0240333	8.98	membrane protein	similar to Membrane fusion protein (MFP) heavy metal cation efflux ZneB (CzcB-like) (multidrug transporter)		high (3)
cheV_1	2	6.84771	0.0309	0.0309	8.91	Chemotaxis protein CheV			high (2)
cheV_2	2	6.84771	0.0309	0.0309	8.91	Chemotaxis protein CheV	Involved in the transmission of sensory signals from the chemoreceptors to the flagellar motors	karatan et al. (2001)	high (2)
hag_1	2	6.84771	0.0309	0.0309	8.91	flagelin			high (2)
hag_2	2	6.84771	0.0309	0.0309	8.91	flagelin			high (2)
malL_2	2	6.84771	0.974	0.026	9.18	Oligo-1,6-glucosidase	maltose metabolism	Gopal et al. (2010)	poor (2)
mnmG	2	5.16178	0.0206	0.0206	9.45	tRNA uridine 5-carboxymethylaminomethyl modification enzyme MnmG	Numerous studies on the bacterial mnmG/mnmA heterodimeric complex have highlighted the connection between tRNA modification, environmental stress responses, and pathogenicity	chen et al. (2021)	high (2)
perR	2	5.38616	0.0206	0.0206	9.66	Peroxide operon regulator	protection against reactive oxygen	Rea et al. (2005)	high (2)
ycaD	2	5.38616	0.0206	0.0206	9.66	putative MFS-type transporter YcaD	putative transporter		high (2)
fsaA_2	1	5.16178	0.0206	0.0206	9.45	Fructose-6-phosphate aldolase 1			high (1)
gmuD_1	1	5.16178	0.0206	0.0206	9.45	glycoside hydrolase family 1 protein (partiel)	Cyanoamino acid metabolism		high (1)
gmuD_2	1	5.16178	0.0206	0.0206	9.45	6-phospho-beta-glucosidase GmuD	Cyanoamino acid metabolism		high (1)
hsdR	1	5.38616	0.0206	0.0206	9.66	Type-1 restriction enzyme R protein			high (1)
iap_3	1	5.38616	0.0206	0.0206	9.66	putative endopeptidase p60	invasion of non-professional phagocytic cells by Listeria	Krawczyk-Balska et l. (2005)	high (1)
IEOCHNDG_00081	1	5.38616	0.0206	0.0206	9.66	LXG domain-containing protein (ribonuclease)	anti bacterial toxin, LXG toxins may assist Listeria in colonizing fermented food communities		high (1)
IEOCHNDG_00780	1	6.45223	0.0206	0.0206	10.5	helix-turn-helix domain-containing protein			high (1)
IEOCHNDG_01072	1	6.45223	0.0206	0.0206	10.5	internaline			high (1)
IEOCHNDG_01624	1	5.16178	0.0206	0.0206	9.45	O-methyltransferase			high (1)
IEOCHNDG_02705	1	6.45223	0.0206	0.0206	10.5	internaline			high (1)
IEOCHNDG_02707|IEOCHNDG_02708	1	5.16178	0.0206	0.0206	9.45	hypothetical protein |hypothetical protein			high (1)
IEOCHNDG_02709|IEOCHNDG_02710	1	6.45223	0.0206	0.0206	10.5	tRNA (uracil-5-)-methyltransferase| BspA family leucine-rich repeat surface protein			high (1)
inlA_1	1	5.16178	0.0206	0.0206	9.45	internaline	putative internalin protein (possible fragment)		high (1)
srlR_1	1	6.45223	0.0206	0.0206	10.5	Glucitol operon repressor	regulate numerous genes not yet fully elucidated. involved in desiccation resistance. (95.26% id. with srlR_3 in LV-BOV-CP-29)	palud et al. (2018)	high (1)
yqhD_1|yqhD_2	1	5.16178	0.0206	0.0206	9.45	Alcohol dehydrogenase YqhD	may be involved in oxidative stress response	Liu et al. (2019)	high (1)

## Sheet: CC6 (22 genomes)
Table S2: hits in genes (reference: FR-FI-U-UN-418) for the CC6
gene	hits	maxp	avg_af	avg_maf	avg_beta	annotations	comment	reference	fitness (N k-mer)
actA	189	2.43297	0.727	0.273	3.22	actA	Actin assembly-inducing protein		poor (189)
apc1	47	2.38195	0.0909	0.0909	4.39	Acetophenone carboxylase alpha subunit			high (47)
atxA	21	2.70997	0.136	0.136	4.48	Anthrax toxin expression trans-acting positive regulator (HTH regulator)	transcriptional regulator		high (21)
ctsR	47	2.38195	0.0909	0.0909	4.39	Transcriptional regulator CtsR	after rRNA - inctivation present hypovirulence, reduced flaA expression and reduced stress resistance	Karatzas (2003)	high (47)
cwlA	1	3.65365	0.727	0.273	3.76	hypothetical protein-N-acetylmuramoyl-L-alanine amidase CwlA	phage related endolysin		poor (1)
inlJ_4	29	2.5986	0.409	0.409	3.09	Internalin-J precursor	internalin of unknown function		high (29)
kdpB_2	1	2.16241	0.591	0.409	2.67	Potassium-transporting ATPase B chain	catalyzes the hydrolysis of ATP coupled with the electrogenic transport of potassium into the cytoplasm	Hain et al. (2012)	poor (1)
lysS	47	2.38195	0.0909	0.0909	4.39	Lysine--tRNA ligase	before rRNA		high (47)
nemR	170	3.44977	0.315322	0.315322	4.00106	bile-regulated transcription factor A (BrtA)	regulate the bile resistance efflux pump	Quilin et al. (2011)	high (46); poor (124)
PROKKA_00012 (yfhF)	18	2.35754	0.909	0.091	4.54	Epimerase family protein	metabolism, upregulated by the sigmaB factor		poor (18)
PROKKA_00091	38	2.42022	0.15065	0.15065	4.46974	hypothetical protein	hypothetical protein		high (38)
PROKKA_00092	38	2.42022	0.15065	0.15065	4.46974	putative hydrolase	hypothetical protein		high (38)
PROKKA_00607	1	2.06349	0.864	0.136	4.15	Phage tail protein	phage related		poor (1)
PROKKA_00620	1	3.11014	0.818	0.182	4.39	Phage portal protein, SPP1 Gp6-like	phage related		poor (1)
PROKKA_00621	1	2.23433	0.364	0.364	3.06	Terminase-like family protein	phage related		poor (1)
PROKKA_00625	27	2.23433	0.364	0.364	3.06	sigma-70 family RNA polymerase sigma factor	phage related regulator		poor (27)
PROKKA_00626	14	2.23433	0.364	0.364	3.06	DUF3954 domain-containing protein	phage related		poor (14)
PROKKA_00628	15	2.23433	0.364	0.364	3.06	DUF1064 domain-containing protein	phage related		poor (15)
PROKKA_00639	1	2.7122	0.773	0.227	3.65	YqaJ-like viral recombinase domain protein	phage related		poor (1)
PROKKA_00688	33	3.12205	0.468242	0.468242	2.63364	hypothetical protein-M protein trans-acting positive regulator (MGA)	transcriptional regulator		high (33)
PROKKA_00728	29	2.5986	0.409	0.409	3.09	hypothetical protein	hypothetical		high (29)
PROKKA_01321	1	2.23433	0.364	0.364	3.06	gp41 (hypothetical protein)	phage related		poor (1)
PROKKA_01322	1	2.23433	0.364	0.364	3.06	phage related hypothetical portein	phage related		poor (1)
PROKKA_01325	8	2.23433	0.364	0.364	3.06	hypothetical protein	phage related		poor (8)
PROKKA_01342	15	2.23433	0.364	0.364	3.06	DUF1064 domain-containing protein	phage related		poor (15)
PROKKA_01354	1	2.23433	0.364	0.364	3.06	Phage capsid family protein	phage related		poor (1)
PROKKA_01369	1	2.16241	0.591	0.409	2.67	hypothetical protein	phage related		poor (1)
PROKKA_01375	1	3.65365	0.727	0.273	3.76	hypothetical protein	phage related		poor (1)
PROKKA_01766	706	5.81816	0.648278	0.351722	3.4946	HTH domain containing domain (fragment)	transcriptional regulator		high (1); poor (705)
PROKKA_01767	81	5.81816	0.732296	0.267704	4.28679	Listeria-Bacteroides repeat domain (List_Bact_rpt)	internalin		poor (81)
PROKKA_01769	41	2.97062	0.151707	0.151707	4.26146	BspA family leucine-rich repeat surface protein	internalin		high (41)
PROKKA_01770	64	2.97062	0.260203	0.260203	3.14391	BspA family leucine-rich repeat surface protein	internalin		high (64)
PROKKA_01771	39	2.70997	0.136	0.136	4.48	hypothetical protein	hypothetical		high (39)
PROKKA_01772|PROKKA_01773	21	3.65365	0.279476	0.279476	3.66952	tRNA (uracil-5-)-methyltransferase/hypothetical protein	intergenic region		high (21)
PROKKA_01773	449	5.10735	0.681367	0.318633	3.6478	Putative internalin	internalin		high (29); poor (420)
PROKKA_01774	167	5.10735	0.688831	0.311169	3.58916	LPXTG cell wall anchor domain-containing protein	internalin		high (2); poor (165)
PROKKA_01775	20	2.70997	0.136	0.136	4.48	hypothetical protein	hypothetical
srlR_1	33	3.12205	0.468242	0.468242	2.63364	Glucitol operon repressor	regulate numerous genes not yet fully elucidated. involved in desiccation resistance	Palud et al. (2018)
ssb_1	5	2.23433	0.364	0.364	3.06	single stranded DNA binding protein	phage related transcriptional regulator		poor (5)
ssb_3	5	2.23433	0.364	0.364	3.06	single stranded DNA binding protein	Phage related transcriptional regulator		poor (5)
ycaD	457	3.64782	0.528243	0.471757	3.25326	putative MFS-type transporter YcaD	major facilitator of salt resistance. transport of the glucosylglycerol osmolite.	Duché et al. (2002)	high (142); poor (315)
ylxH	172	3.44977	0.317992	0.317992	3.985	Flagellum site-determining protein FlhF	FlhF is a GTPase associated with flagellin localization and flagellar transcription		high (46); poor (126)
